4. Goldman L, Caldera D, Southwick F, Nussbaum SR, Murray B, O'Malley TA, Goroll AH, Caplan CH, Nolan J, Burke DS, Krogstad D, Carabello B, Slater EF: Cardiac risk factors and complications in non-cardiac surgery. *Medicine* 57:357-370, 1978
5. El-Baz N, Goldin M: Continuous epidural infusion of morphine for pain relief after cardiac operations. *J Thorac Cardiovasc Surg* 93:878-83, 1987
6. Cuschieri RJ, Morran CG, Howie JC, McArdle CS: Postoperative pain and pulmonary complications: Comparison of three analgesic regimens. *Br J Surg* 72:495-498, 1985
7. Isaacson IJ, Weitz FI, Berry AJ, Knos GB, Venner DS: Intrathecal morphine's effect on the postoperative course of patients undergoing abdominal aortic surgery. *Anesth Analg* 66:S86, 1987
8. Rawal N, Sjostrand U, Christoffersson E: Comparison of intramuscular and epidural morphine for postoperative analgesia in the grossly obese: Influence on postoperative ambulation and pulmonary function. *Anesth Analg* 63:683-592, 1984
9. Christensen P, Brandt MR, Rem J, Kehlet H: Influence of extradural morphine on the adrenocortical and hyperglycaemic response to surgery. *Br J Anaesth* 54:23-27, 1982
10. Hjortso NC, Neumann P, Frosig F, Andersen T, Lindhard A, Rogon E, Kehlet H: A controlled study on the effect of epidural analgesia with local anaesthetics and morphine on morbidity after abdominal surgery. *Acta Anaesthesiol Scand* 29:790-796, 1985

(Accepted for publication September 18, 1987.)

**Erratum**

In ANESTHESIOLOGY volume 67, number 3, in the Review Article by Beatrice L. Selvin titled "Electroconvulsive Therapy—1987," table 3 was printed incorrectly. The table should correctly be as follows:

TABLE 3. Comparison of Type and Relative Frequency of Cardiac Arrhythmias in the Cardiac and Non-cardiac Patients Using Various Intravenous Anesthetic Agents\*

|                                    | Non-cardiac |             | Cardiac |             |
|------------------------------------|-------------|-------------|---------|-------------|
|                                    | Vagal       | Sympathetic | Vagal   | Sympathetic |
| Methohexital <sup>39,116-119</sup> | 10%         | 20%         | 10%     | 20%         |
| Thiopental <sup>116-119</sup>      | 20%         | 40%         | 40%     | 80%         |
| Thiamylal <sup>39</sup>            | 60%         | 40%         | **      | **          |
| Diazepam <sup>39,117,122</sup>     | 40%         | 60%         | 80%     | 80%         |

All percentages in the columns are approximate.

\* All patients received prophylactic atropine and were oxygenated and ventilated.

\*\* No data available.
